# Supplementary material for: CRISPR-Cas Systems in Gut Microbiome of Children with Autism Spectrum Disorders
Source: Preprints.org preprint supplement (doi:10.20944/preprints202201.0296.v1), 2022-01-20
Supplement: Supplementary file 1 [file Supplementary Table 1.xlsx]

## Sheet: Series_I
Healthy	I_8S6	I_9S7	I_10S8	I_11S9	I_12S10
Gender	female	female	male	female	female
Age (years old)	4	3	3	4	3
Assembly size (Gb)	0.16	0.13	0.16	0.19	0.15
Arrays	142	153	187	159	162
Arrays/Gb	887.5	1176.92	1168.75	836.842	1080
Arrays with flank 200	31	14	22	29	14
Arrays with cas	31	16	21	37	19
Spacers	1370	1126	1245	1587	999
Spacers/Arrays (flank >= 200)	17.74	13.14	15.95	23.83	12.36
Protospacers/Spacers (%)	8.25	6.84	3.78	3.02	6.21
Class 2 systems (%)	0.17	0.14	0.28	0.21	0.21
ASD	I_3S1	I_4S2	I_5S3	I_6S4	I_7S5	I_13S11	I_14S12	I_15S13	I_16S14	I_17S15	I_18S16	I_19S17	I_20S18	I_22S20
Gender	male	male	male	male	male	male	female	male	female	male	male	male	male	male
Age (years old)	3	3	1	4	3	7	9	7	3	9	4	3	4	3
Assembly size (Gb)	0.13	0.21	0.14	0.26	0.16	0.2	0.21	0.21	0.14	0.22	0.18	0.15	0.06	0.1
Arrays	154	204	131	245	136	175	155	223	177	244	182	98	49	83
Arrays/Gb	1184.62	971.429	935.714	942.308	850	875	738.095	1061.9	1264.29	1109.09	1011.11	653.333	816.667	830
Arrays with flank 200	22	35	27	28	21	15	16	21	15	44	31	10	5	21
Arrays with cas	19	33	23	29	24	20	18	26	18	48	31	13	6	26
Spacers	916	1632	1126	1941	1010	1264	1414	1536	1166	2161	1453	668	364	815
Spacers/Arrays (flank >= 200)	12.09	16.8	16.63	21.07	14.81	18.07	18.63	22.29	11.33	18.14	17	24.5	22.4	18
Protospacers/Spacers (%)	6.22	5.39	4.97	4.28	6.53	3.24	4.1	7.88	4.89	7.45	8.88	5.99	10.71	4.66
Class 2 systems (%)	0.28	0.17	0.1	0.26	0.13	0.2	0.18	0.36	0.29	0.16	0.23	0.15	0.17	0.29

## Sheet: Series_II
Healthy	II_16	II_17	II_18	II_19	II_20	II_21	II_22	II_23	II_24	II_25	II_26	II_27	II_28	II_29	II_30
Gender	male	female	male	male	male	male	female	male	male	male	male	male	male	male	male
Age (years old)	2	3	3	2	3	4	3	3	3	3	2	3	3	3	3
Assembly size (Gb)	0.18	0.18	0.15	0.14	0.15	0.19	0.2	0.17	0.17	0.22	0.17	0.28	0.21	0.14	0.17
Arrays	104	98	112	123	82	88	151	159	91	164	127	180	153	101	99
Arrays/Gb	577.778	544.444	746.667	878.571	546.667	463.158	755	935.294	535.294	745.455	747.059	642.857	728.571	721.429	582.353
Arrays with flank 200	28	21	13	29	16	19	29	32	19	24	18	24	30	22	28
Arrays with cas	28	25	22	26	14	22	34	32	22	32	18	32	32	23	29
Spacers	673	1091	669	1144	603	596	1108	1148	550	1261	804	1402	1144	743	920
Spacers/Arrays (flank >= 200)	11.25	15.71	8.54	18.52	13.5	12	10.34	18.19	13.58	13.17	11.78	15	13.6	15.64	15.82
Protospacers/Spacers (%)	10.4	5.32	10.61	3.67	9.12	5.7	1.9	3.92	9.09	5.79	3.11	8.35	6.47	6.06	5.87
Class 2 systems (%)	0.32	0.14	0.4	0.17	0.36	0.3	0.19	0.15	0.43	0.23	0.38	0.2	0.31	0.26	0.35
ASD	II_1	II_2	II_3	II_4	II_5	II_6	II_7	II_8	II_9	II_10	II_11	II_12	II_13	II_14	II_15
Gender	male	female	male	male	male	male	female	male	male	male	male	male	male	male	male
Age (years old)	2	3	4	4	3	3	4	3	2	4	3	2	4	3	4
Assembly size (Gb)	0.16	0.16	0.12	0.11	0.12	0.17	0.23	0.15	0.25	0.3	0.16	0.18	0.17	0.16	0.26
Arrays	73	75	52	67	78	107	148	92	185	198	137	160	107	106	154
Arrays/Gb	456.25	468.75	433.333	609.091	650	629.412	643.478	613.333	740	660	856.25	888.889	629.412	662.5	592.308
Arrays with flank 200	7	8	10	12	22	16	35	23	28	31	22	34	24	24	34
Arrays with cas	10	17	15	16	13	26	38	22	39	41	24	37	27	27	36
Spacers	434	639	548	445	763	802	1161	829	1306	1429	884	1108	926	780	1372
Spacers/Arrays (flank >= 200)	22.57	23	18.5	16.33	16.27	16.56	14.43	13.17	13.43	13.55	12.5	12.12	18.92	14.63	16.35
Protospacers/Spacers (%)	8.99	4.23	2.37	5.39	9.83	8.35	6.72	11.34	5.51	7.35	5.54	4.87	8.96	6.92	4.52
Class 2 systems (%)	0.4	0.29	0.15	0.13	0.18	0.33	0.32	0.21	0.21	0.28	0.22	0.16	0.38	0.29	0.18

## Sheet: Series_III
Healthy	III_86	III_87	III_88
Gender	male	female	male
Age (years old)	3	3	3
Assembly size (Gb)	0.24	0.27	0.17
Arrays	174	210	133
Arrays/Gb	725	777.778	782.353
Arrays with flank 200	39	55	17
Arrays with cas	35	54	28
Spacers	1235	1903	1007
Spacers/Arrays (flank >= 200)	12.8	19.6	10.9
Protospacers/Spacers (%)	7.13	7.41	11.32
Class 2 systems (%)	0.3	0.4	0.29
ASD	III_61	III_63	III_64	III_65	III_66	III_67	III_69	III_70	III_71	III_72	III_73	III_74	III_75	III_76	III_77	III_78	III_79	III_80	III_81	III_82	III_83	III_84	III_85	III_91	III_92
Gender	male	male	male	male	male	male	male	male	male	male	male	male	male	male	female	male	female	male	female	male	male	male	male	male	male
Age (years old)	4	6	2	3	3	4	5	5	4	3	4	3	3	3	4	4	5	3	3	3	4	3	2	4	3
Assembly size (Gb)	0.28	0.14	0.21	0.16	0.22	0.21	0.29	0.34	0.37	0.24	0.17	0.35	0.18	0.26	0.23	0.19	0.19	0.16	0.17	0.22	0.18	0.12	0.23	0.15	0.11
Arrays	188	45	169	86	108	116	155	255	309	180	119	262	149	221	206	145	128	93	105	191	115	84	216	112	120
Arrays/Gb	671.429	321.429	804.762	537.5	490.909	552.381	534.483	750	835.135	750	700	748.571	827.778	850	895.652	763.158	673.684	581.25	617.647	868.182	638.889	700	939.13	746.667	1090.91
Arrays with flank 200	48	14	40	17	29	36	44	42	42	39	22	39	30	61	68	30	32	16	19	22	22	20	61	16	17
Arrays with cas	51	15	43	17	36	36	51	57	58	41	22	52	26	63	70	32	41	20	22	30	23	23	60	24	15
Spacers	1690	301	1437	556	1019	1050	1422	1994	2102	1569	858	2191	1076	1697	1554	1221	1137	640	798	1712	875	676	1727	872	855
Spacers/Arrays (flank >= 200)	13.8	9.7	20.05	9.2	19.3	17.5	14.95	14.9	11.1	20.4	14.7	19.5	12.03	11.7	10.8	12.2	13.8	17.8	12.5	30.2	14.2	18.9	12.7	13.9	21.1
Protospacers/Spacers (%)	5.15	6.31	2.57	3.78	3.93	5.9	7.17	3.86	4.66	5.74	2.45	3.79	3.35	4.48	4.7	3.03	4.93	3.28	4.51	1.69	9.26	6.95	4.57	7.22	2.81
Class 2 systems (%)	0.34	0.21	0.31	0.13	0.28	0.26	0.3	0.26	0.18	0.27	0.24	0.21	0.15	0.22	0.3	0.07	0.18	0.29	0.15	0.25	0.32	0.26	0.19	0.18	0.1
