# Supplementary material for: CRISPR-Cas Systems in Gut Microbiome of Children with Autism Spectrum Disorders
Source: Preprints.org preprint supplement (doi:10.20944/preprints202201.0296.v1), 2022-01-20
Supplement: Supplementary file 2 [file Supplementary Table 2.xlsx]

## Sheet: Series_I
GenBank accession	Name	Family	ASD	Control group
AF020798.1	Streptococcus phage TP-J34	Siphoviridae	1	0
AF085222.2	Streptococcus thermophilus bacteriophage DT1	Siphoviridae	6	1
AF115102.1	Streptococcus thermophilus bacteriophage Sfi19	Siphoviridae	2	0
AF115103.1	Streptococcus thermophilus bacteriophage Sfi21	Siphoviridae	2	0
AF145054.1	Streptococcus thermophilus bacteriophage 7201	Siphoviridae	16	3
AJ560763.1	Haemophilus phage Aaphi23	Myoviridae	1	0
AY699705.1	Streptococcus thermophilus bacteriophage 2972	Siphoviridae	2	1
CP029253.1	Streptococcus phage VS-2018a	Siphoviridae	3	0
FJ226752.1	Streptococcus phage ALQ13.2	Siphoviridae	3	0
FJ965538.1	Streptococcus phage 5093	Siphoviridae	1	0
HG380752.1	Streptococcus phage TP-778L	Siphoviridae	1	0
HG424323.1	Streptococcus phage 20617	Siphoviridae	8	1
JQ680355.1	Unidentified phage clone 1013	N/A	0	2
JQ680357.1	Unidentified phage clone 2011	N/A	2	2
JQ680361.1	Unidentified phage clone 2019	N/A	11	4
JQ680363.1	Unidentified phage clone 2020	N/A	1	0
JQ680364.1	Unidentified phage clone 2200	N/A	5	0
JQ680367.1	Unidentified phage clone 2203	N/A	1	0
JQ680368.1	Unidentified phage clone 2204	N/A	2	1
JQ680374.1	Unidentified phage clone 2209	N/A	2	0
JQ680376.1	Unidentified phage clone 2209	N/A	2	0
KJ003981.1	Uncultured phage WW-nAnB strain 2	Inoviridae	1	0
KJ003982.1	Uncultured phage WW-nAnB strain 3	Inoviridae	2	1
KJ489401.1	Bacillus phage Megatron	Herelleviridae	2	0
KM209288.1	Dickeya phage phiDP23.1 clone pD23	Ackermannviridae	1	0
KT264792.1	Gokushovirus WZ-2015a isolate 44Mky08	Microviridae	2	0
KT717083.1	Streptococcus phage 73	Siphoviridae	0	1
KT717084.1	Streptococcus phage 53	Siphoviridae	1	0
KT717085.1	Streptococcus phage 128	Siphoviridae	1	0
KU678391.1	Streptococcus virus 9873	Siphoviridae	1	0
KU678392.1	Streptococcus virus 9874	Siphoviridae	2	0
KX513873.1	Human gut gokushovirus isolate SH-CHD10	Microviridae	1	0
KY705259.1	Streptococcus phage P5641	Siphoviridae	1	0
KY705275.1	Streptococcus phage P7632	Siphoviridae	1	0
KY705276.1	Streptococcus phage P7633	Siphoviridae	3	0
KY705280.1	Streptococcus phage P7954	Siphoviridae	1	0
KY705284.1	Streptococcus phage P9851	Siphoviridae	1	0
KY705288.1	Streptococcus phage P9901	Siphoviridae	2	0
KY705290.1	Streptococcus phage P9903	Siphoviridae	0	1
LR596903.1	Roseburia phage Shimadzu	Myoviridae	8	1
LR756492.1	uncultured phage	N/A	1	1
MF161328.1	Streptococcus phage D4276	Siphoviridae	2	3
MG543995.1	Staphylococcus phage UPMK_1	Siphoviridae	0	2
MG592485.1	Vibrio phage 1.111.B._10N.286.45.E6	Myoviridae	1	0
MG708274.1	Streptococcus phage vB_SthS_VA214	Siphoviridae	3	0
MG708275.1	Streptococcus phage vB_SthS_VA460	Siphoviridae	1	0
MG711460.1	Faecalibacterium phage FP_Mushu	Myoviridae	5	4
MG711462.1	Faecalibacterium phage FP_Epona	Myoviridae	41	9
MG711464.1	Faecalibacterium phage FP_Lugh	Siphoviridae	1	0
MG711465.1	Faecalibacterium phage FP_Brigit	Myoviridae	11	3
MG711466.1	Faecalibacterium phage FP_Toutatis	Myoviridae	3	4
MG711467.1	Faecalibacterium phage FP_Taranis	Myoviridae	20	23
MG945130.1	Microviridae sp. isolate 133-1602	Microviridae	2	4
MG945228.1	Microviridae sp. isolate 1079-180	Microviridae	2	0
MG945381.1	Microviridae sp. isolate 3158-1801	Microviridae	0	1
MG945388.1	Microviridae sp. isolate 3296-1801	Microviridae	1	0
MG945434.1	Microviridae sp. isolate 4967-1801	Microviridae	1	0
MG945515.1	Microviridae sp. isolate 1931-1706	Microviridae	1	0
MG945532.1	Microviridae sp. isolate 2318-1801	Microviridae	1	0
MG945725.1	Microviridae sp. isolate 2191-1602	Microviridae	3	1
MG945790.1	Microviridae sp. isolate 4372-1801	Microviridae	1	0
MH000604.1	Streptococcus phage D1811	Siphoviridae	1	0
MH616914.1	Inoviridae sp. isolate ctfh53	Inoviridae	1	0
MH617034.2	Microviridae sp. isolate ctbf41	Microviridae	1	0
MH937462.1	Streptococcus phage CHPC663	Siphoviridae	1	0
MH937466.1	Streptococcus phage CHPC875	Siphoviridae	1	0
MH937468.1	Streptococcus phage CHPC879	Siphoviridae	1	0
MH937470.1	Streptococcus phage CHPC925	Siphoviridae	2	0
MH937474.1	Streptococcus phage CHPC930	Siphoviridae	1	0
MH937489.1	Streptococcus phage CHPC1034	Siphoviridae	1	0
MH937503.1	Streptococcus phage CHPC1084	Siphoviridae	0	1
MH937509.1	Streptococcus phage CHPC1230	Siphoviridae	1	0
MH973661.1	Streptococcus phage SW5	Siphoviridae	1	0
MK238400.1	CrAssphage ZA	Podoviridae	1	0
MK415400.1	Phage apr34_1784	Siphoviridae	4	7
MK415407.1	Phage FAKO27_000271F	N/A	1	0
MK415409.1	Phage YS1-2_2434	Siphoviridae	0	1
MK448940.1	Streptococcus phage Javan444	Siphoviridae	1	0
MK448980.1	Streptococcus phage Javan536	Siphoviridae	2	0
MK972714.1	Salmonella phage SW3	Myoviridae	1	0
MT121965.1	Parabacteroides phage SC_7_H3_2017	N/A	0	2
NC_001664.4	Human betaherpesvirus 6A	Herpesviridae	1	0
NC_002520.1	Amsacta moorei entomopoxvirus ''L''	Poxviridae	1	0
NC_003521.1	Panine herpesvirus 2 strain Heberling	Herpesviridae	1	0
NC_014649.1	Acanthamoeba polyphaga mimivirus	Mimiviridae	1	0
NC_016072.1	Megavirus chiliensis	Mimiviridae	1	0
NC_023426.1	Anomala cuprea entomopoxvirus	Poxviridae	1	0
NC_023442.1	Buzura suppressaria nucleopolyhedrovirus isolate Hubei	Baculoviridae	1	0
NC_023610.1	Erwinia phage PhiEaH1	Myoviridae	1	0
NC_024808.1	Ethiopian tobacco bushy top virus isolate 18-2	Tombusviridae	1	0
NC_027374.1	Bacillus phage Moonbeam	Herelleviridae	1	0
NC_032751.1	Hubei tick virus 3 strain tick108426	N/A	1	0
NC_033160.1	Hubei picorna-like virus 79 strain WHCCII12350	N/A	1	0
NC_037665.1	Pandoravirus macleodensis	N/A	1	0
NC_043529.1	Oxyplax ochracea nucleopolyhedrovirus isolate 435	Baculoviridae	1	0
NC_043687.1	Zegla virus isolate BT5012	Peribunyaviridae	1	0
NC_047850.1	Klebsiella phage MezzoGao	Drexlerviridae	1	0
NC_048070.1	Corynebacterium phage Juicebox	Siphoviridae	1	0
NC_048677.1	Lactobacillus phage LpeD	Herelleviridae	0	1
NC_048756.1	Nodularia phage vB_NspS-kac65v151	Siphoviridae	1	0
NC_049476.1	Lactococcus phage P4565	Siphoviridae	1	0
U24159.1	Bacteriophage HP1 strain HP1c1	Myoviridae	1	1
U88974.1	Streptococcus phage 01205	Siphoviridae	1	0
X77469.1	Streptococcus thermophilus bacteriophage SFi18	Siphoviridae	1	0

## Sheet: Series_II
GenBank accession	Name	Family	ASD	Control group
AF115102.1	Streptococcus thermophilus bacteriophage Sfi19	Siphoviridae	0	1
AF145054.1	Streptococcus thermophilus bacteriophage 7201	Siphoviridae	0	2
AF158600.2	Streptococcus phage Sfi11	Siphoviridae	0	1
AF503408.1	Enterobacteria phage P7	Myoviridae	3	0
CP054387.1	Escherichia phage CMS-2020a	Siphoviridae	2	0
FJ008913.1	Bacteroides phage B40-8 culture-collection ATCC:51477-B1	Siphoviridae	4	1
FJ226752.1	Streptococcus phage ALQ13.2	Siphoviridae	0	1
FJ965538.1	Streptococcus phage 5093	Siphoviridae	0	1
HE608841.1	Bacteroides phage B124-14	Siphoviridae	1	1
HG380752.1	Streptococcus phage TP-778L complete genome	Siphoviridae	0	1
JQ680349.1	Unidentified phage clone 1013_scaffold24	N/A	2	0
JQ680351.1	Unidentified phage clone 1013_scaffold1563	N/A	0	1
JQ680355.1	Unidentified phage clone 1013_scaffold7838	N/A	1	1
JQ680356.1	Unidentified phage clone 2011_scaffold3	N/A	1	0
JQ680357.1	Unidentified phage clone 2011_scaffold13	N/A	2	1
JQ680361.1	Unidentified phage clone 2019_scaffold132	N/A	12	10
JQ680362.1	Unidentified phage clone 2019_scaffold260	N/A	2	0
JQ680363.1	Unidentified phage clone 2020_scaffold1264	N/A	1	0
JQ680364.1	Unidentified phage clone 2200_scaffold1335	N/A	4	4
JQ680365.1	Unidentified phage clone 2200_scaffold2278	N/A	1	0
JQ680366.1	Unidentified phage clone 2200_scaffold2352	N/A	1	0
JQ680367.1	Unidentified phage clone 2203_scaffold802	N/A	0	1
JQ680368.1	Unidentified phage clone 2204_scaffold14	N/A	0	2
JQ680376.1	Unidentified phage clone 2209_scaffold1451	N/A	5	4
JQ680377.1	Unidentified phage clone 2210_scaffold709	N/A	1	0
KJ003981.1	Uncultured phage WW-nAnB strain 2	Inoviridae	2	1
KJ003982.1	Uncultured phage WW-nAnB strain 3	Inoviridae	2	1
KM589515.1	Parabacteroides phage YZ-2015a	Microviridae	0	2
KT264760.1	Gokushovirus WZ-2015a isolate 12Fra21	Microviridae	3	0
KT264764.1	Gokushovirus WZ-2015a isolate 16IC3	Microviridae	1	1
KT264772.1	Gokushovirus WZ-2015a isolate 24Fra20	Microviridae	0	1
KT264786.1	Gokushovirus WZ-2015a isolate 38Chd443	Microviridae	0	3
KT264788.1	Gokushovirus WZ-2015a isolate 40Chd434	Microviridae	0	1
KT264791.1	Gokushovirus WZ-2015a isolate 43Fra07	Microviridae	1	0
KT264794.1	Gokushovirus WZ-2015a isolate 46Fx8	Microviridae	0	4
KT264822.1	Gokushovirus WZ-2015a isolate 74Chd23	Microviridae	2	8
KT319615.1	UNVERIFIED: Listeria phage WIL-3	Herelleviridae	0	1
KX513864.1	Human gokushovirus isolate SH-CHD1	Microviridae	1	0
KX513867.1	UNVERIFIED: Listeria phage WIL-3	Herelleviridae	0	1
KX513869.1	Human gut gokushovirus isolate SH-CHD6	Microviridae	0	1
KX513873.1	Human gut gokushovirus isolate SH-CHD10	Microviridae	0	1
KX513875.1	Human gut microviridae SH-CHD12	Microviridae	1	0
KY705290.1	Streptococcus phage P9903	Siphoviridae	0	1
LR596903.1	Roseburia phage Shimadzu	Myoviridae	3	4
LR756492.1	uncultured phage genome assembly	N/A	1	0
MG025518.1	Gokushovirus MK-2017 isolate AA_01	Microviridae	1	0
MG543995.1	Staphylococcus phage UPMK_1	Siphoviridae	3	0
MG708275.1	Streptococcus phage vB_SthS_VA460	Siphoviridae	0	2
MG711460.1	Faecalibacterium phage FP_Mushu	Myoviridae	14	4
MG711462.1	Faecalibacterium phage FP_Epona	Myoviridae	33	16
MG711464.1	Faecalibacterium phage FP_Lugh	Siphoviridae	0	1
MG711465.1	Faecalibacterium phage FP_Brigit	Myoviridae	13	3
MG711466.1	Faecalibacterium phage FP_Toutatis	Myoviridae	6	4
MG711467.1	Faecalibacterium phage FP_Taranis	Myoviridae	16	16
MG945130.1	UNVERIFIED: Microviridae sp. isolate 133-1602	Microviridae	2	2
MG945231.1	UNVERIFIED: Microviridae sp. isolate 1313-1801	Microviridae	0	1
MG945333.1	UNVERIFIED: Microviridae sp. isolate 2135-1801	Microviridae	0	1
MG945334.1	UNVERIFIED: Microviridae sp. isolate 2182-1801	Microviridae	1	0
MG945488.1	UNVERIFIED: Microviridae sp. isolate 1133-1602	Microviridae	2	0
MG945532.1	UNVERIFIED: Microviridae sp. isolate 2318-1801	Microviridae	1	0
MG945572.1	UNVERIFIED: Microviridae sp. isolate 3523-1602	Microviridae	1	0
MG945703.1	UNVERIFIED: Microviridae sp. isolate 3523-1602	Microviridae	3	0
MG945705.1	UNVERIFIED: Microviridae sp. isolate 1804-1801	Microviridae	1	0
MG945725.1	UNVERIFIED: Microviridae sp. isolate 2191-1602	Microviridae	1	1
MG945730.1	UNVERIFIED: Microviridae sp. isolate 2295-1801	Microviridae	1	0
MG945743.1	UNVERIFIED: Microviridae sp. isolate 2576-1702	Microviridae	1	2
MG945797.1	UNVERIFIED: Microviridae sp. isolate 4494-1801	Microviridae	0	1
MG945820.1	UNVERIFIED: Microviridae sp. isolate 5884-1801	Microviridae	0	1
MG945908.1	UNVERIFIED: Microviridae sp. isolate 5193-1602	Microviridae	0	1
MG945914.1	UNVERIFIED: Microviridae sp. isolate 8858-1602	Microviridae	1	0
MH510273.2	MAG: Microvirus sp. isolate ctbg7	Microviridae	1	0
MH616835.2	MAG: Microviridae sp. isolate ctdb52	Microviridae	1	0
MH617682.2	MAG: Microviridae sp. isolate ctcb14	Microviridae	1	0
MH937499.1	Streptococcus phage CHPC1062	Siphoviridae	0	1
MK069403.1	UNVERIFIED: CrAssphage sp. O-152	Podoviridae	0	2
MK415400.1	MAG: Phage apr34_1784	N/A	6	41
MK415406.1	MAG: Phage FAKO27_000238F	N/A	0	2
MK415407.1	MAG: Phage FAKO27_000271F	N/A	4	0
MK765590.1	Tortoise microvirus 40 isolate 40_SP_83	Microviridae	1	0
MT074135.1	Bacteroides phage ARB25	N/A	1	0
MT074144.1	Bacteroides phage HNL35	N/A	1	0
MT074152.1	Bacteroides phage SJC14	N/A	1	0
MT074157.1	Bacteroides phage SJC20	N/A	1	0
MT121965.1	Parabacteroides phage SC_7_H3_2017	N/A	1	0
MT630433.1	Bacteroides phage vB_BfrS_23	Siphoviridae	3	0
MT635598.1	Bacteroides phage Bacuni_F1	N/A	0	1

## Sheet: Series_III
GenBank accession	Name	Family	ASD	Control group
AF074719.1	Bacteriophage B40-8	Siphoviridae	1	0
AF085222.2	Streptococcus thermophilus bacteriophage DT1	Siphoviridae	1	1
AF145054.1	Streptococcus thermophilus bacteriophage 7201	Siphoviridae	2	7
AF503408.1	Enterobacteria phage P7	Myoviridae	3	0
AP013456.1	Uncultured Mediterranean phage uvMED	Siphoviridae	1	0
AY699705.1	Streptococcus thermophilus bacteriophage 2972	Siphoviridae	0	1
CP029253.1	Streptococcus phage VS-2018a	Siphoviridae	0	1
DQ838728.1	Lactococcus phage P335	Siphoviridae	1	1
FJ008913.1	Bacteroides phage B40-8	Siphoviridae	1	0
FM864213.1	Streptococcus phage phi-m46.1	Siphoviridae	0	2
FN997652.1	Streptococcus phage phi-SsUD.1	Siphoviridae	1	0
HE608841.1	Bacteroides phage B124-14	Siphoviridae	3	0
HG380752.1	Streptococcus phage TP-778L	Siphoviridae	0	1
HG424323.1	Streptococcus phage 20617	Siphoviridae	0	1
JN402401.1	Uncultured phage WW-nAnB	Inoviridae	0	1
JQ680355.1	Unidentified phage clone 1013	N/A	4	0
JQ680356.1	Unidentified phage clone 2011	N/A	4	0
JQ680357.1	Unidentified phage clone 2011	N/A	2	2
JQ680361.1	Unidentified phage clone 2019	N/A	19	4
JQ680362.1	Unidentified phage clone 2019	N/A	0	2
JQ680364.1	Unidentified phage clone 2200	N/A	7	1
JQ680365.1	Unidentified phage clone 2200	N/A	10	0
JQ680366.1	Unidentified phage clone 2200	N/A	3	1
JQ680367.1	Unidentified phage clone 2203	N/A	1	0
JQ680368.1	Unidentified phage clone 220	N/A	5	0
JQ680376.1	Unidentified phage clone 2209	N/A	0	2
KJ003981.1	Uncultured phage WW-nAnB strain 2	Inoviridae	0	2
KJ003982.1	Uncultured phage WW-nAnB strain 3	Inoviridae	1	1
KM000109.1	Uncultured phage crAssphage clone TSDC8.2-F14R17-25	Podoviridae	1	0
KT264760.1	Gokushovirus WZ-2015a isolate 12Fra21	Microviridae	1	2
KT264788.1	Gokushovirus WZ-2015a isolate 40Chd434	Microviridae	1	0
KT264789.1	Gokushovirus WZ-2015a isolate 41Mky07	Microviridae	0	1
KT264790.1	Gokushovirus WZ-2015a isolate 42Fra01	Microviridae	1	0
KT264794.1	Gokushovirus WZ-2015a isolate 46Fx8	Microviridae	2	1
KT264822.1	Gokushovirus WZ-2015a isolate 74Chd23	Microviridae	5	0
KT319643.1	Listeria phage WIL-3	Herelleviridae	0	1
KU678392.1	Streptococcus virus 9874	Siphoviridae	0	1
KX513872.1	Human gut gokushovirus isolate SH-CHD9	Microviridae	2	0
KX513877.1	Human gut gokushovirus isolate SH-CHD14	Microviridae	1	0
KY442063.1	Staphylococcus phage Andhra	Rountreeviridae	1	0
KY705273.1	Streptococcus phage P7602	Siphoviridae	0	4
KY705290.1	Streptococcus phage P9903	Siphoviridae	0	2
LC553736.1	Salmonella phage SAP012	Siphoviridae	1	0
LR596902.1	Roseburia phage Jekyll	N/A	1	2
LR596903.1	Roseburia phage Shimadzu	Myoviridae	9	0
LR756492.1	uncultured phage	N/A	0	2
MF161328.1	Streptococcus phage D4276	Siphoviridae	0	1
MG708274.1	Streptococcus phage vB_SthS_VA214	Siphoviridae	1	1
MG708275.1	Streptococcus phage vB_SthS_VA460	Siphoviridae	0	1
MG711460.1	Faecalibacterium phage FP_Mushu	Myoviridae	10	3
MG711462.1	Faecalibacterium phage FP_Epona	Myoviridae	46	3
MG711465.1	Faecalibacterium phage FP_Brigit	Myoviridae	10	1
MG711466.1	Faecalibacterium phage FP_Toutatis	Myoviridae	9	0
MG711467.1	Faecalibacterium phage FP_Taranis	Myoviridae	21	3
MG945130.1	Microviridae sp. isolate 133-1602	Microviridae	4	3
MG945135.1	Microviridae sp. isolate 185-1602	Microviridae	1	0
MG945488.1	Microviridae sp. isolate 1133-1602	Microviridae	2	0
MG945569.1	Microviridae sp. isolate 3467-1801	Microviridae	0	1
MG945572.1	Microviridae sp. isolate 3523-1602	Microviridae	1	0
MG945664.1	Microviridae sp. isolate 553-1801	Microviridae	1	0
MG945705.1	Microviridae sp. isolate 1804-1801	Microviridae	1	0
MG945743.1	Microviridae sp. isolate 2576-1702	Microviridae	1	0
MG945754.1	Microviridae sp. isolate 3067-1801	Microviridae	1	0
MG945820.1	Microviridae sp. isolate 5884-1801	Microviridae	2	0
MH000604.1	Streptococcus phage D1811	Siphoviridae	0	1
MH572413.1	Microviridae sp. isolate SD_SF_6	Microviridae	1	0
MH616835.2	Microviridae sp. isolate ctdb52	Microviridae	0	1
MH616914.1	Inoviridae sp. isolate ctfh53	Inoviridae	2	0
MH617106.1	Inoviridae sp. isolate ctcb32	Inoviridae	2	0
MH937462.1	Streptococcus phage CHPC66	Siphoviridae	0	1
MH937465.1	Streptococcus phage CHPC873	Siphoviridae	1	0
MH937493.1	Streptococcus phage CHPC1041	Siphoviridae	0	1
MH937507.1	Streptococcus phage CHPC1152	Siphoviridae	1	0
MK249142.1	Blackfly microvirus SF02 isolate 030	Microviridae	1	0
MK415400.1	Phage apr34_1784	Siphoviridae	42	0
MK415406.1	Phage FAKO27_000238F	Myoviridae	3	0
MK415407.1	Phage FAKO27_000271F	N/A	5	0
MK415408.1	CrAssphage GF1-2_000079F	Podoviridae	1	0
MK448711.1	Streptococcus phage Javan235	Siphoviridae	1	0
MK765594.1	Tortoise microvirus 13 isolate 13_SP_104	Microviridae	1	0
MK972714.1	Salmonella phage SW	Myoviridae	1	0
MN078104.1	Bacteroides phage Barc2635	Siphoviridae	1	0
MN270277.1	Streptococcus phage phi-SsuYTJ2_rum	Siphoviridae	1	0
MT074160.1	Bacteroides phage SJC25	N/A	1	0
MT635598.1	Bacteroides phage Bacuni_F	N/A	1	0
NC_002331.1	Xestia c-nigrum granulovirus	Baculoviridae	1	0
NC_002520.1	Amsacta moorei entomopoxvirus 'L'	Poxviridae	0	1
NC_003038.1	Invertebrate iridescent virus 6	Iridoviridae	5	0
NC_005068.1	Cryptophlebia leucotreta granulovirus	Baculoviridae	1	0
NC_005217.1	Sin Nombre orthohantavirus	Hantaviridae	1	0
NC_005906.1	Neodiprion lecontei nucleopolyhedrovirus	Baculoviridae	1	0
NC_006574.1	Mopeia virus AN20410 segment L	Arenaviridae	1	0
NC_009741.1	Basella rugose mosaic virus	Potyviridae	1	0
NC_014637.1	Cafeteria roenbergensis virus BV-PW1	Mimiviridae	2	0
NC_014649.1	Acanthamoeba polyphaga mimivirus	Mimiviridae	1	0
NC_015960.1	Yokapox virus	Poxviridae	1	0
NC_016899.1	Thermococcus prieurii virus 1	N/A	1	0
NC_022098.1	Pandoravirus salinus	N/A	1	1
NC_022233.1	Porcine cytomegalovirus strain BJ09	Herpesviridae	1	0
NC_022968.1	Escherichia phage 4MG	Myoviridae	1	0
NC_023426.1	Anomala cuprea entomopoxvirus DNA	Poxviridae	1	0
NC_023442.1	Buzura suppressaria nucleopolyhedrovirus isolate Hubei	Baculoviridae	1	0
NC_023610.1	Erwinia phage PhiEaH1	Myoviridae	1	0
NC_023639.1	Mimivirus terra2	Mimiviridae	2	0
NC_024906.1	Rose leaf rosette-associated virus isolate RLRaV-CWR.1	Closteroviridae	1	0
NC_025825.1	Raccoon dog amdovirus	Parvoviridae	1	0
NC_027925.1	Apis mellifera filamentous virus isolate CH-CO5	N/A	4	2
NC_028247.1	Citrobacter phage Michonne	Myoviridae	0	1
NC_028763.1	Polaribacter phage P12002S	Siphoviridae	1	0
NC_029599.1	Lake Sarah-associated circular virus-17 isolate LSaCV-17-LSMU-2013	N/A	1	0
NC_029692.1	Brazilian marseillevirus strain BH2014	Marseilleviridae	1	0
NC_031038.1	Skunkpox virus strain WA	Poxviridae	1	0
NC_031107.2	Erwinia phage vB_EamM_Asesino	Myoviridae	1	0
NC_031918.1	Salmonella phage 64795_sal3	Siphoviridae	1	0
NC_032753.1	Hubei tetragnatha maxillosa virus 4 strain arthropodmix13651	N/A	1	0
NC_033264.1	Hubei narna-like virus 13 strain QTM27075	N/A	1	0
NC_033749.1	Wuhan insect virus 35 strain WHCCII10556	N/A	1	0
NC_033761.1	Hubei myriapoda virus 5 strain GCM10499	Mypoviridae	1	0
NC_033816.1	Wuhan insect virus 12 strain arthropodmix13526	N/A	1	0
NC_035460.1	Eptesipox virus strain Washington	Poxviridae	1	0
NC_036594.1	Orpheovirus IHUMI-LCC2	Phycodnaviridae	3	0
NC_038529.1	Eothenomys miletus hantavirus LX309	Hantaviridae	1	0
NC_040699.1	Drosophila innubila nudivirus isolate DiNV_CH01M	Nudiviridae	0	1
NC_041887.1	Rhodococcus phage Weasels2	Siphoviridae	1	0
NC_043352.1	Glyptapanteles indiensis bracovirus	Polydnaviridae	1	0
NC_047912.1	Faecalibacterium phage FP_Lugh	Siphoviridae	1	0
NC_047915.1	Faecalibacterium phage FP_Toutatis	Myoviridae	2	0
NC_048087.1	Enterococcus phage EfV12-phi1	Herelleviridae	1	0
NC_049831.1	Shigella virus Sfin-3	Drexlerviridae	1	0
U24159.1	Bacteriophage HP1 strain HP1c1	Myoviridae	1	0
U88974.1	Streptococcus phage 01205	Siphoviridae	0	1
