# Supplementary material for: CRISPR-Cas Systems in Gut Microbiome of Children with Autism Spectrum Disorders
Source: Preprints.org preprint supplement (doi:10.20944/preprints202201.0296.v1), 2022-01-20
Supplement: Supplementary file 3 [file Supplementary Table 3.xlsx]

## Sheet: NZ_CABKPL010000002.1
Bacteria's name / Stage number	Hit to spacer		Locus tag 1	Accession number 1	Annotation 1 ( + comments)	Locus tag 2	Annotation 2	Relationship
Ruminococcaceae bacterium isolate MGYG-HGUT-01356	Start	End
Series_I	457658	457690	FXY57_RS10850	WP_008981396.1	helix-turn-helix transcriptional regulator	FXY57_RS10855	helix-turn-helix domain-containing protein	both_out
	458824	458860	FXY57_RS10865	WP_051355062.1	TM2 domain-containing protein	FXY57_RS10870	N-acetylmuramoyl-L-alanine amidase	right_only
	460348	460313			unannotated region
	461412	461380	FXY57_RS16030	WP_008981404.1	hypothetical protein	FXY57_RS16025	hypothetical protein	diff_prot
	463507	463539	FXY57_RS10895	WP_008981406.1	RNA-directed DNA polymerase			same_prot
	463599	463566	FXY57_RS10895	WP_008981406.1	RNA-directed DNA polymerase			same_prot
	465481	465513	FXY57_RS10910	WP_040649713.1	hypothetical protein			same_prot
	466204	466238	FXY57_RS10915	WP_020989841.1	hypothetical protein			same_prot
	467395	467361	FXY57_RS10925	WP_008981412.1	hypothetical protein			same_prot
	468678	468644	FXY57_RS10935	WP_008981414.1	phage tail protein I			same_prot
	469643	469676	FXY57_RS10940	WP_020989843.1	baseplate J/gp47 family protein			same_prot
	470084	470117	FXY57_RS10940	WP_020989843.1	baseplate J/gp47 family protein			same_prot
	471493	471459	FXY57_RS10955	WP_051355054.1	hypothetical protein			same_prot
	474302	474271	FXY57_RS10970	WP_020989846.1	phage tail tape measure protein			same_prot
	475719	475752	FXY57_RS10980	WP_008981423.1	phage major tail tube protein			same_prot
	477076	477108	FXY57_RS10985	WP_008981424.1	phage tail sheath family protein			same_prot
	480139	480107	FXY57_RS11010	WP_008981429.1	head decoration protein	FXY57_RS11010	head decoration protein	left_only
	480436	480468	FXY57_RS11010	WP_008981429.1	head decoration protein			same_prot
	481309	481276	FXY57_RS11015	WP_008981430.1	Clp protease ClpP			same_prot
	482027	482058	FXY57_RS11020	WP_084203555.1	phage portal protein			same_prot
	492902	492935	FXY57_RS11090	-	modification methylase MunI			same_prot
	493126	493094	FXY57_RS11090	-	modification methylase MunI			same_prot
	493398	493430	FXY57_RS11095	WP_084203572.1	Holliday junction resolvase RecU			same_prot
	ProphageHunter
	Phast
	Both
	Blast
	Annotation
	Bacterial

## Sheet: NZ_LR700079.1
Bacteria's name / Stage number	Hit to spacer		Locus tag 1	Accession number 1	Annotation 1 ( + comments)	Locus tag 2	Annotation 2	Relationship
Faecalibacterium prausnitzii strain P9225	Start	End
Series_I	129459	129494	GO822_RS03725	WP_156058333.1	hypothetical protein			same_prot
	130323	130290	GO822_RS03735	WP_156058334.1	hypothetical protein	GO822_RS03735	hypothetical protein	right_only
	133683	133655	GO822_RS03780	WP_156058342.1	amidase			same_prot
	137130	137162	GO822_RS03815	WP_156058345.1	hypothetical protein			same_prot
	137682	137650	GO822_RS03815	WP_156058345.1	hypothetical protein			same_prot
	141514	141482	GO822_RS03845	WP_156058348.1	hypothetical protein			same_prot
	150336	150370	GO822_RS03890	WP_156058513.1	phage tail protein			same_prot
	150571	150539	GO822_RS03895	WP_097786157.1	hypothetical protein	GO822_RS03890	phage tail protein	diff_prot
	152079	152047	GO822_RS03910	WP_156058355.1	hypothetical protein			same_prot
	153613	153645	GO822_RS03915	WP_097786161.1	HK97 family phage prohead protease			same_prot
	159366	159332	GO822_RS03945	WP_097786167.1	site-specific DNA-methyltransferase			same_prot
	159797	159830	GO822_RS03945	WP_097786167.1	site-specific DNA-methyltransferase	GO822_RS03950	hypothetical protein	both_out
	171317	171284	GO822_RS04030	WP_156058371.1	DEAD/DEAH box helicase			same_prot
	171994	171961	GO822_RS04030	WP_156058371.1	DEAD/DEAH box helicase	GO822_RS04035	hypothetical protein	both_out
	173110	173078			unannotated region
	176358	176391	GO822_RS04085	WP_156058378.1	DUF4236 domain-containing protein	GO822_RS04090	recombinase family protein	right_only
	ProphageHunter
	Phast
	Both
	Blast
	Annotation
	Bacterial

## Sheet: NZ_QSUE01000002.1
Bacteria's name / Stage number	Hit to spacer		Locus tag 1	Accession number 1	Annotation 1 ( + comments)	Locus tag 2	Annotation 2	Relationship
Eubacterium rectale strain OM05-8AA	Start	End
Series_I	370149	370113	DXB76_RS04240	WP_117689811.1	phage tail protein			same_prot
	375653	375621	DXB76_RS04275	WP_117689804.1	phage tail tape measure protein			same_prot
	375853	375882	DXB76_RS04275	WP_117689804.1	phage tail tape measure protein			same_prot
	377985	377952	DXB76_RS04275	WP_117689804.1	phage tail tape measure protein			same_prot
	381528	381499	DXB76_RS04295	WP_117689800.1	hypothetical protein	DXB76_RS04290	phage tail sheath family protein	diff_prot
	381878	381845	DXB76_RS04300	WP_117689799.1	hypothetical protein			same_prot
	383776	383744	DXB76_RS04320	WP_117689795.1	DUF2190 family protein			same_prot
	384703	384735	DXB76_RS04325	WP_117689794.1	hypothetical protein			same_prot
	389753	389719	DXB76_RS04350	WP_117689978.1	hypothetical protein			same_prot
	392265	392232	DXB76_RS04355	WP_117689790.1	site-specific DNA-methyltransferase	DXB76_RS04360	hypothetical protein	both_out
	393004	392975	DXB76_RS04360	WP_117689789.1	hypothetical protein			same_prot
	396310	396344	DXB76_RS04405	WP_117689782.1	hypothetical protein	DXB76_RS04410	hypothetical protein	diff_prot
	398644	398611	DXB76_RS04415	WP_117689780.1	DUF927 domain-containing protein			same_prot
	ProphageHunter
	Phast
	Both
	Blast
	Annotation
	Bacterial

## Sheet: NZ_WKPY01000020.1
Bacteria's name / Stage number	Hit to spacer		Locus tag 1	Accession number 1	Annotation 1 ( + comments)	BLAST	Locus tag 2	Annotation 2	Relationship
Faecalibacterium prausnitzii strain BIOML-B15	Start	End
Series_I	15325	15359	GKD81_RS07980	WP_129872743.1	metallophosphoesterase	Myoviridae sp.			same_prot
	17331	17298	GKD81_RS07985	WP_154251254.1	DUF4373 domain-containing protein	Siphoviridae sp.			same_prot
	19314	19347	GKD81_RS07995	WP_129872808.1	hypothetical protein	Siphoviridae sp.			same_prot
	20243	20210	GKD81_RS08005	WP_129872746.1	hypothetical protein	Myoviridae sp.			same_prot
	21794	21828	GKD81_RS08015	WP_129872748.1	DUF2786 domain-containing protein	Myoviridae sp.			same_prot
	23243	23278	GKD81_RS08030	WP_129872750.1	hypothetical protein		GKD81_RS08035	hypothetical protein	both_out
	24779	24746	GKD81_RS08050	WP_129872753.1	hypothetical protein		GKD81_RS08055	hypothetical protein	both_out
	27171	27205	GKD81_RS08075	WP_129872758.1	50S ribosomal protein L36				same_prot
	32764	32798	GKD81_RS08115	WP_117505024.1	hypothetical protein				same_prot
	33026	33061	GKD81_RS08120	WP_129872766.1	terminase B				same_prot
	45226	45260	GKD81_RS08200	WP_172715423.1	phage tail tape measure protein				same_prot
	45729	45762	GKD81_RS08200	WP_172715423.1	phage tail tape measure protein				same_prot
	46544	46511	GKD81_RS08200	WP_172715423.1	phage tail tape measure protein				same_prot
	ProphageHunter
	Phast
	Both
	Blast
	Annotation
	Bacterial

## Sheet: NZ_CABMEW010000015.1
Bacteria's name / Stage number	Hit to spacer		Locus tag 1	Accession number 1	Annotation 1 ( + comments)	Locus tag 2	Annotation 2	Relationship
Eubacterium ramulus isolate MGYG-HGUT-02278	Start	End
Series_I	6786	6752	FXZ40_RS12440	WP_118703189.1	helix-turn-helix domain-containing protein			same_prot
Series_III	8892	8858	FXZ40_RS12455	WP_118703138.1	hypothetical protein	FXZ40_RS12460	DUF2786 domain-containing protein	both_out
Series_III	10073	10107	FXZ40_RS12470	-	adenine methyltransferase			same_prot
Series_I	10127	10094	FXZ40_RS12470	-	adenine methyltransferase			same_prot
Series_II + Series_III	11219	11184	FXZ40_RS12475	WP_118703141.1	hypothetical protein	FXZ40_RS12480	hypothetical protein	both_out
Series_I	11411	11445	FXZ40_RS12480	WP_118703142.1	hypothetical protein			same_prot
Series_II	11610	11581	FXZ40_RS12480	WP_118703142.1	hypothetical protein			same_prot
Series_II	12639	12669	FXZ40_RS12485	WP_118703190.1	transglycosylase SLT domain-containing protein			same_prot
Series_III	12952	12924	FXZ40_RS12485	WP_118703190.1	transglycosylase SLT domain-containing protein			same_prot
Series_III	13955	13991	FXZ40_RS12500	WP_118699317.1	hypothetical protein			same_prot
Series_II	14074	14041	FXZ40_RS12500	WP_118699317.1	hypothetical protein			same_prot
Series_II	15957	15925	FXZ40_RS12520	WP_118703145.1	hypothetical protein			same_prot
Series_III	18270	18234	FXZ40_RS12540	WP_118699323.1	type II toxin-antitoxin system PemK/MazF family toxin			same_prot
Series_I + Series_III	20457	20490	FXZ40_RS12555	WP_118703149.1	hypothetical protein	FXZ40_RS12560	HNH endonuclease	both_out
Series_I + Series_II	20505	20534	FXZ40_RS12555	WP_118703149.1	hypothetical protein - RpoE super family; DNA-directed RNA polymerase specialized sigma subunit, sigma24 family	FXZ40_RS12560	HNH endonuclease	both_out
Series_III	21196	21162	FXZ40_RS12560	WP_118703150.1	HNH endonuclease			same_prot
Series_II	21270	21242	FXZ40_RS12560	WP_118703150.1	HNH endonuclease	FXZ40_RS12565	phage terminase small subunit P27 family	both_out
Series_I	21302	21335	FXZ40_RS12560	WP_118703150.1	HNH endonuclease	FXZ40_RS12565	phage terminase small subunit P27 family	both_out
Series_II	21726	21691	FXZ40_RS12565	WP_118703151.1	phage terminase small subunit P27 family			same_prot
Series_II	22055	22090	FXZ40_RS12570	WP_118703152.1	terminase large subunit			same_prot
Series_III	22741	22712	FXZ40_RS12570	WP_118703152.1	terminase large subunit			same_prot
Series_III	23156	23122	FXZ40_RS12570	WP_118703152.1	terminase large subunit			same_prot
Series_II	24545	24580	FXZ40_RS12575	WP_118703192.1	phage portal protein			same_prot
Series_II	25523	25557	FXZ40_RS12580	WP_118703153.1	Clp protease ClpP			same_prot
Series_III	25580	25545	FXZ40_RS12580	WP_118703153.1	Clp protease ClpP			same_prot
Series_II	26508	26473	FXZ40_RS12585	WP_118703193.1	phage major capsid protein			same_prot
Series_I	26756	26790	FXZ40_RS12585	WP_118703193.1	phage major capsid protein			same_prot
Series_I	29434	29469	FXZ40_RS12615	WP_118703157.1	hypothetical protein			same_prot
Series_I	29762	29796	FXZ40_RS12620	WP_118703158.1	hypothetical protein			same_prot
Series_III	30636	30665	FXZ40_RS12625	WP_118703159.1	phage tail tape measure protein			same_prot
Series_III	30818	30784	FXZ40_RS12625	WP_118703159.1	phage tail tape measure protein			same_prot
Series_III	33529	33553	FXZ40_RS12625	WP_118703159.1	phage tail tape measure protein			same_prot
Series_I + Series_II + Series_III	33534	33505	FXZ40_RS12625	WP_118703159.1	phage tail tape measure protein			same_prot
Series_II	34653	34625	FXZ40_RS12635	WP_118703161.1	phage tail protein			same_prot
Series_I	40238	40273	FXZ40_RS12665	WP_118703167.1	hypothetical protein			same_prot
Series_I	44538	44509	FXZ40_RS12710	WP_118703173.1	hypothetical protein			same_prot
Series_II	40826	40799	FXZ40_RS12670	WP_118703168.1	hypothetical protein			same_prot
Series_III	40902	40868	FXZ40_RS12670	WP_118703168.1	hypothetical protein			same_prot
Series_III	42748	42713	FXZ40_RS12695	WP_118703170.1	hypothetical protein			same_prot
Series_III	43124	43090	FXZ40_RS12705	WP_118703172.1	hypothetical protein	FXZ40_RS12705	hypothetical protein	left_only
Series_III	43342	43307	FXZ40_RS12705	WP_118703172.1	hypothetical protein			same_prot
Series_II	43709	43742	FXZ40_RS12705	WP_118703172.1	hypothetical protein			same_prot
Series_II	44404	44371	FXZ40_RS12710	WP_118703173.1	hypothetical protein			same_prot
	ProphageHunter
	Phast
	Both
	Blast
	Annotation
	Bacterial

## Sheet: NZ_CVRQ01000025.1
Bacteria's name / Stage number	Hit to spacer		Locus tag 1	Accession number 1	Annotation 1 ( + comments)	Locus tag 2	Annotation 2	Relationship
Eubacterium rectale strain T1-815	Start	End
Series_II	86372	86406	T1815_RS10495	WP_055062291.1	hypothetical protein - PHA02664 super family (Parapoxvirus)			same_prot
	87043	87077	T1815_RS10500	WP_003506213.1	SH3 domain-containing protein			same_prot
	94986	95018	T1815_RS10555	WP_055062298.1	hypothetical protein			same_prot
	96639	96606	T1815_RS10560	WP_055062363.1	phage tail tape measure protein			same_prot
	100421	100392	T1815_RS10580	WP_055062301.1	hypothetical protein			same_prot
	104391	104424	T1815_RS10610	WP_055062305.1	phage portal protein			same_prot
	106263	106289	T1815_RS10615	WP_055062306.1	terminase large subunit			same_prot
	107604	107633	T1815_RS10620	WP_055062307.1	phage terminase small subunit P27 family	T1815_RS10625	hypothetical protein	left_only
	108215	108187	T1815_RS10625	WP_004605262.1	hypothetical protein - RasGAP super family			same_prot
	112024	111995	T1815_RS10655	WP_055062310.1	DUF3850 domain-containing protein			same_prot
	112400	112371	T1815_RS10660	WP_003506150.1	hypothetical protein			same_prot
	114626	114597	T1815_RS10675	WP_055062312.1	hypothetical protein			same_prot
	117663	117691	T1815_RS10700	WP_055062314.1	hypothetical protein - PHA00330 super family (Gokushovirinae)			same_prot
	119969	120002	T1815_RS10715	WP_055062315.1	hypothetical protein			same_prot
	120959	120992	T1815_RS10725	WP_145981893.1	hypothetical protein	T1815_RS10730	helix-turn-helix transcriptional regulator	both_out
	121316	121345	T1815_RS10730	WP_004605235.1	helix-turn-helix transcriptional regulator			same_prot
	ProphageHunter
	Phast
	Both
	Blast
	Annotation
	Bacterial

## Sheet: NZ_PRLF01000024.1
Bacteria's name / Stage number	Hit to spacer		Locus tag 1	Accession number 1	Annotation 1 ( + comments)	Locus tag 2	Accession number 2	Annotation 2	Relationship
Faecalibacterium prausnitzii strain APC924/119	Start	End
Series_II	2504	2470	C4N21_RS12595	WP_181573330.1	helix-turn-helix domain-containing protein	C4N21_RS12600	WP_112121971.1	helix-turn-helix domain-containing protein	both_out
	3107	3073	C4N21_RS12605	WP_112121972.1	hypothetical protein	C4N21_RS12610	WP_112121973.1	hypothetical protein	both_out
	3630	3597	C4N21_RS12615	WP_112121974.1	hypothetical protein	C4N21_RS12615	WP_112121974.1	hypothetical protein	right_only
	4627	4594	C4N21_RS12620	WP_112121975.1	DUF932 domain-containing protein				same_prot
	7204	7173	C4N21_RS12635	WP_112121978.1	hypothetical protein				same_prot
	9481	9512	C4N21_RS12655	WP_112121982.1	phage replisome organizer N-terminal domain-containing protein				same_prot
	11786	11753	C4N21_RS12680	WP_112121987.1	hypothetical protein				same_prot
	12585	12551	C4N21_RS12685	WP_112121988.1	N-6 DNA methylase				same_prot
	13104	13074	C4N21_RS12690	WP_112121989.1	ParB N-terminal domain-containing protein				same_prot
	14972	14939	C4N21_RS12705	WP_112121992.1	hypothetical protein	C4N21_RS12710	WP_112121993.1	hypothetical protein	both_out
	18519	18489	C4N21_RS12745	WP_146746944.1	hypothetical protein				same_prot
	19310	19340	C4N21_RS12750	WP_112122001.1	queuosine precursor transporter	C4N21_RS12755	WP_112122002.1	helix-turn-helix domain-containing protein	left_only
	23169	23203	C4N21_RS12765	WP_112122021.1	phage portal protein				same_prot
	28662	28629	C4N21_RS12795	WP_112122006.1	hypothetical protein				same_prot
	29247	29214	C4N21_RS12805	WP_112122008.1	DUF3383 family protein				same_prot
	34204	34237	C4N21_RS12820	WP_112122011.1	hypothetical protein				same_prot
	35558	35524	C4N21_RS12830	WP_112122013.1	hypothetical protein	C4N21_RS12835	WP_146746945.1	hypothetical protein	both_out
	36028	36060	C4N21_RS12835	WP_146746945.1	hypothetical protein				same_prot
	36521	36488	C4N21_RS12840	WP_112122015.1	hypothetical protein				same_prot
	38514	38481	C4N21_RS12850	WP_112122017.1	baseplate J/gp47 family protein	C4N21_RS12850	WP_112122017.1	baseplate J/gp47 family protein	left_inter
	38946	38913	C4N21_RS12855	WP_112122018.1	hypothetical protein				same_prot
	39831	39866	C4N21_RS12860	WP_112122019.1	hypothetical protein				same_prot
	41003	40971	C4N21_RS12865	WP_112122020.1	hypothetical protein				same_prot
	ProphageHunter
	Phast
	Both
	Blast
	Annotation
	Bacterial

## Sheet: NZ_QRVS01000017.1
Bacteria's name / Stage number	Hit to spacer		Locus tag 1	Accession number 1	Annotation 1 ( + comments)	Locus tag 2	Accession number 2	Annotation 2	Relationship
Roseburia inulinivorans strain AF21-31	Start	End
Series_II + Series_III	4964	4998	DWX81_RS07195	WP_118586436.1	phage holin family protein				same_prot
Series_III	6485	6513	DWX81_RS07210	WP_181976136.1	hypothetical protein				same_prot
Series_II	9850	9883	DWX81_RS07225	WP_118586454.1	hypothetical protein				same_prot
Series_III	10005	9973	DWX81_RS07225	WP_118586454.1	hypothetical protein				same_prot
Series_II	13383	13411	DWX81_RS07245	WP_118586628.1	hypothetical protein				same_prot
Series_II + Series_III	13914	13948	DWX81_RS07250	WP_118586466.1	hypothetical protein				same_prot
Series_II + Series_III	15008	15042	DWX81_RS07260	WP_118586631.1	hypothetical protein - так в аннотации				same_prot
Series_II	16904	16872	DWX81_RS07280	WP_118586478.1	hypothetical protein				same_prot
Series_III	16906	16934	DWX81_RS07280	WP_118586478.1	hypothetical protein				same_prot
Series_II	17189	17157	DWX81_RS07285	WP_118586481.1	hypothetical protein				diff_prot
Series_III	17828	17860	DWX81_RS07285	WP_118586481.1	hypothetical protein	DWX81_RS07290	WP_118586484.1	hypothetical protein	diff_prot
Series_II	17901	17930	DWX81_RS07290	WP_118586484.1	hypothetical protein				same_prot
Series_III	17940	17911	DWX81_RS07290	WP_118586484.1	hypothetical protein				same_prot
Series_II	18699	18670	DWX81_RS07295	WP_118586487.1	hypothetical protein				same_prot
Series_III	18714	18742	DWX81_RS07295	WP_118586487.1	hypothetical protein				same_prot
Series_III	18733	18768	DWX81_RS07295	WP_118586487.1	hypothetical protein				same_prot
Series_III	18786	18821	DWX81_RS07295	WP_118586487.1	hypothetical protein				same_prot
Series_II	19317	19286	DWX81_RS07300	WP_118586490.1	hypothetical protein				same_prot
Series_II	19566	19533	DWX81_RS07305	WP_118586493.1	hypothetical protein				same_prot
Series_III	20816	20847	DWX81_RS07315	WP_118586499.1	hypothetical protein				same_prot
Series_II	21177	21148	DWX81_RS07315	WP_118586499.1	hypothetical protein				same_prot
Series_II	21914	21885	DWX81_RS07320	WP_118586502.1	minor capsid protein				same_prot
Series_III	21995	22024	DWX81_RS18720	WP_181976138.1	hypothetical protein				same_prot
Series_II + Series_III	22086	22052	DWX81_RS18720	WP_181976138.1	hypothetical protein				same_prot
Series_II	22947	22918	DWX81_RS07325	WP_118586505.1	phage capsid protein				same_prot
Series_III	23080	23048	DWX81_RS07325	WP_118586505.1	phage capsid protein				same_prot
Series_II	23731	23702	DWX81_RS07330	WP_118586508.1	hypothetical protein				same_prot
Series_II	25847	25876	DWX81_RS07340	WP_118586514.1	hypothetical protein	DWX81_RS07345	WP_118586517.1	hypothetical protein	left_only
Series_III	26057	26086	DWX81_RS07345	WP_118586517.1	hypothetical protein				same_prot
Series_II	26368	26339	DWX81_RS07350	WP_118586520.1	hypothetical protein				same_prot
Series_II	27067	27044	DWX81_RS07360	WP_118586526.1	ABC transporter ATP-binding protein				same_prot
Series_II	27764	27797	DWX81_RS07370	WP_118586634.1	DNA adenine methylase				same_prot
Series_II	29376	29404	DWX81_RS07380	WP_118586535.1	DNA cytosine methyltransferase				same_prot
Series_II	30412	30443	DWX81_RS07385	WP_181976140.1	DNA (cytosine-5-)-methyltransferase				same_prot
Series_II	31395	31362	DWX81_RS07390	WP_181976141.1	hypothetical protein				same_prot
Series_III	33700	33728			unannotated region
Series_III	34427	34394	DWX81_RS07425	WP_118586558.1	YopX family protein				same_prot
Series_II + Series_III	34894	34927	DWX81_RS07430	WP_118586561.1	hypothetical protein				same_prot
Series_III	36501	36469	DWX81_RS07450	WP_118586574.1	ATP-binding protein				same_prot
Series_III	36506	36477	DWX81_RS07450	WP_118586574.1	ATP-binding protein				same_prot
Series_II	37775	37804	DWX81_RS07455	WP_118586577.1	hypothetical protein				same_prot
Series_III	37931	37963	DWX81_RS07460	WP_118586580.1	RusA family crossover junction endodeoxyribonuclease				same_prot
Series_III	40498	40527	DWX81_RS07480	WP_118586592.1	ERF family protein	DWX81_RS07485	WP_118586595.1	DUF1351 domain-containing protein	diff_prot
Series_III	42570	42603	DWX81_RS07500	WP_118586604.1	hypothetical protein	DWX81_RS18740	WP_181976144.1	hypothetical protein	right_only
Series_II	42979	43008	DWX81_RS07505	WP_118586607.1	helix-turn-helix transcriptional regulator				same_prot
Series_III	44350	44379	DWX81_RS07515	WP_181976145.1	recombinase family protein				same_prot
	ProphageHunter
	Phast
	Both
	Blast
	Annotation
	Bacterial

## Sheet: NZ_WKZJ01000002.1
Bacteria's name / Stage number	Hit to spacer		Locus tag 1	Accession number 1	Annotation 1 ( + comments)	Locus tag 2	Accession number 2	Annotation 2	Relationship
Faecalibacterium sp. BIOML-A1	Start	End
Series_II	243006	242973	GKG36_RS03370	WP_154259111.1	tyrosine-type recombinase/integrase				same_prot
	250245	250212	GKG36_RS03425	WP_154259133.1	hypothetical protein				same_prot
	260778	260809	GKG36_RS03530	WP_154259170.1	PBSX family phage terminase large subunit				same_prot
	261684	261717	GKG36_RS03535	WP_154259172.1	phage portal protein				same_prot
	263389	263421	GKG36_RS03540	WP_194167070.1	hypothetical protein				same_prot
	264091	264121	GKG36_RS03545	WP_154259176.1	hypothetical protein				same_prot
	266844	266810	GKG36_RS03570	WP_154259186.1	hypothetical protein	GKG36_RS03580	WP_154259188.1	hypothetical protein	both_out
	267973	268007	GKG36_RS03585	-	hypothetical protein				same_prot
	268924	268890	GKG36_RS03595	WP_154259192.1	hypothetical protein				same_prot
	281905	281935	GKG36_RS03685	WP_154259227.1	hypothetical protein	GKG36_RS03690	WP_154259230.1	hypothetical protein	both_out
	283488	283456	GKG36_RS03705	WP_154259236.1	hypothetical protein				same_prot
	284938	284906	GKG36_RS03715	WP_154259240.1	hypothetical protein				same_prot
	285507	285473	GKG36_RS03720	WP_154259242.1	hypothetical protein				same_prot
	ProphageHunter
	Phast
	Both
	Blast
	Annotation
	Bacterial

## Sheet: NZ_WKQF01000002.1
Bacteria's name / Stage number	Hit to spacer		Locus tag 1	Accession number 1	Annotation 1 ( + comments)	Locus tag 2	Accession number 2	Annotation 2	Relationship
Faecalibacterium prausnitzii strain BIOML-B8	Start	End
Series_II	101439	101404	GKE00_RS02690	WP_154251578.1	hypothetical protein				same_prot
Series_III	102062	102030	GKE00_RS02700	WP_097786138.1	hypothetical protein				same_prot
Series_III	102140	102105	GKE00_RS02700	WP_097786138.1	hypothetical protein				same_prot
Series_III	102387	102354	GKE00_RS02710	WP_154251575.1	hypothetical protein				same_prot
Series_II	103221	103189	GKE00_RS02715	WP_154251574.1	hypothetical protein				same_prot
Series_II	104344	104311	GKE00_RS02720	WP_154251573.1	hypothetical protein				same_prot
Series_III	104859	104825	GKE00_RS02720	WP_154251573.1	hypothetical protein				same_prot
Series_III	105147	105113	GKE00_RS02720	WP_154251573.1	hypothetical protein				same_prot
Series_III	105534	105499	GKE00_RS02725	WP_097786143.1	phage tail protein				same_prot
Series_II	105659	105625	GKE00_RS02725	WP_097786143.1	phage tail protein				same_prot
Series_III	105789	105757	GKE00_RS02725	WP_097786143.1	phage tail protein				same_prot
Series_III	106410	106443	GKE00_RS02730	WP_154251572.1	phage tail protein				same_prot
Series_II + Series_III	106869	106903	GKE00_RS02730	WP_154251572.1	phage tail protein				same_prot
Series_III	107353	107389	GKE00_RS02735	WP_097786145.1	baseplate J/gp47 family protein				same_prot
Series_II	107515	107483	GKE00_RS02735	WP_097786145.1	baseplate J/gp47 family protein				same_prot
Series_III	108053	108086	GKE00_RS02735	WP_097786145.1	baseplate J/gp47 family protein				same_prot
Series_II	108936	108969	GKE00_RS02750	WP_154251570.1	hypothetical protein				same_prot
Series_III	109554	109587	GKE00_RS02755	WP_154251569.1	hypothetical protein				same_prot
Series_III	110315	110347	GKE00_RS02755	WP_154251569.1	hypothetical protein				same_prot
Series_II	110438	110472	GKE00_RS02755	WP_154251569.1	hypothetical protein				same_prot
Series_II	110947	110980	GKE00_RS02760	WP_154251568.1	tail protein X				same_prot
Series_II	112914	112882	GKE00_RS02765	WP_154251567.1	phage tail tape measure protein				same_prot
Series_II	115179	115145	GKE00_RS02775	WP_097786153.1	phage major tail tube protein				same_prot
Series_III	115313	115346	GKE00_RS02775	WP_097786153.1	phage major tail tube protein	GKE00_RS02780	WP_154251566.1	phage tail sheath family protein	diff_prot
Series_II + Series_III	115598	115565	GKE00_RS02780	WP_154251566.1	phage tail sheath family protein				same_prot
Series_II	118344	118378	GKE00_RS02800	WP_097786157.1	hypothetical protein				same_prot
Series_III	118572	118538	GKE00_RS02805	WP_154251562.1	hypothetical protein				same_prot
Series_II	119442	119407	GKE00_RS02815	WP_154265080.1	hypothetical protein				same_prot
Series_II	122645	122612	GKE00_RS02825	WP_154251560.1	phage portal protein				same_prot
Series_II + Series_III	123493	123525	GKE00_RS02835	WP_154251558.1	hypothetical protein	GKE00_RS02840	WP_154251557.1	phage terminase large subunit family protein	diff_prot
Series_III	125502	125467	GKE00_RS02845	WP_097786338.1	hypothetical protein				same_prot
Series_III	126863	126830	GKE00_RS02850	-	DNA modification methylase				same_prot
Series_II + Series_III	127971	128005	GKE00_RS02850	-	DNA modification methylase	GKE00_RS02855	WP_143406040.1	hypothetical protein	both_out
Series_III	128804	128773	GKE00_RS02865	WP_097786170.1	hypothetical protein	GKE00_RS02860	WP_097786169.1	hypothetical protein	diff_prot
Series_III	129502	129468			unannotated region
Series_II	130145	130111	GKE00_RS02880	WP_154251556.1	HD domain-containing protein				same_prot
Series_III	130521	130555	GKE00_RS02885	WP_154251555.1	hypothetical protein				same_prot
Series_II	132901	132871	GKE00_RS02905	WP_154251551.1	DUF927 domain-containing protein				same_prot
Series_III	133679	133711	GKE00_RS02905	WP_154251551.1	DUF927 domain-containing protein				same_prot
Series_III	135064	135032	GKE00_RS02905	WP_154251551.1	DUF927 domain-containing protein				same_prot
Series_II + Series_III	136294	136261	GKE00_RS02915	WP_154251549.1	hypothetical protein				same_prot
Series_III	137019	136987	GKE00_RS02925	WP_154251547.1	hypothetical protein	GKE00_RS02920	WP_154251548.1	hypothetical protein	diff_prot
Series_II	137732	137766	GKE00_RS02935	WP_097786181.1	hypothetical protein	GKE00_RS02940	WP_154251546.1	DEAD/DEAH box helicase	diff_prot
Series_III	139088	139056	GKE00_RS02940	WP_154251546.1	DEAD/DEAH box helicase				same_prot
Series_III	141052	141020	GKE00_RS02960	WP_154251543.1	hypothetical protein				same_prot
Series_II	141850	141883	GKE00_RS02975	WP_154251540.1	hypothetical protein				same_prot
Series_III	144482	144515	GKE00_RS03000	WP_154251536.1	recombinase family protein				same_prot
	ProphageHunter
	Phast
	Both
	Blast
	Annotation
	Bacterial

[truncated: 16 more sheets: NZ_QSFJ01000016.1, NZ_NMTQ01000037.1, NZ_JPJG01000059.1, NZ_NFIM01000001.1, NZ_WKQM01000001.1, NZ_VSTG01000001.1, NZ_QRYW01000006.1, NZ_LR700104.1, NZ_JAAOCG010000035.1, NZ_UATG01000005.1, NZ_NMTX01000025.1, NZ_CAAECM010000239.1, NZ_CABIXW010000001.1, NZ_JAAIRI010000023.1, NZ_JACOQI010000018.1, NZ_QSQN01000005.1]
